# Supplementary material
Source: publisher figshare collection journal article supplement (https://acs.figshare.com/ndownloader/files/12810830)
Supplement: Supplementary file 1 [file 12810830]

# Magnetic Hyperfine Interactions in the Mixed-Valence Compound $\text{Fe}_7(\text{PO}_4)_6$ from Mössbauer Experiments

Alexey V. Sobolev<sup>1,\*</sup>, Alena A. Akulenko<sup>1</sup>, Iana S. Glazkova<sup>1</sup>, Alexei A. Belik<sup>2</sup>,  
Takao Furubayashi<sup>3</sup>, Larisa V. Shvanskaya<sup>1,4</sup>, Olga V. Dimitrova<sup>1</sup>, Igor A. Presniakov<sup>1</sup>

<sup>1</sup>*Lomonosov Moscow State University, 119991 Moscow, Russia*

<sup>2</sup>*Research Center for Functional Materials, National Institute for Materials Science (NIMS),  
Namiki 1-1, Tsukuba, Ibaraki 305-0044, Japan*

<sup>3</sup>*Research Center for Magnetic and Spintronic Materials, National Institute for Materials  
Science (NIMS), Sengen 1-2-1, Tsukuba, Ibaraki 305-0047, Japan*

<sup>4</sup>*National University of Science and Technology "MISiS", 119049 Moscow, Russia*

\*corresponding author, e-mail: alex@radio.chem.msu.ru, salex12@rambler.ru

## Supporting Information

This section consists of a figure with results of magnetic measurements (curves  $M$  vs  $H$ ) and also includes detailed information about the procedure of the calculation of a lattice contribution to the electric field gradient (EFG) tensor as well as crystal field calculations.

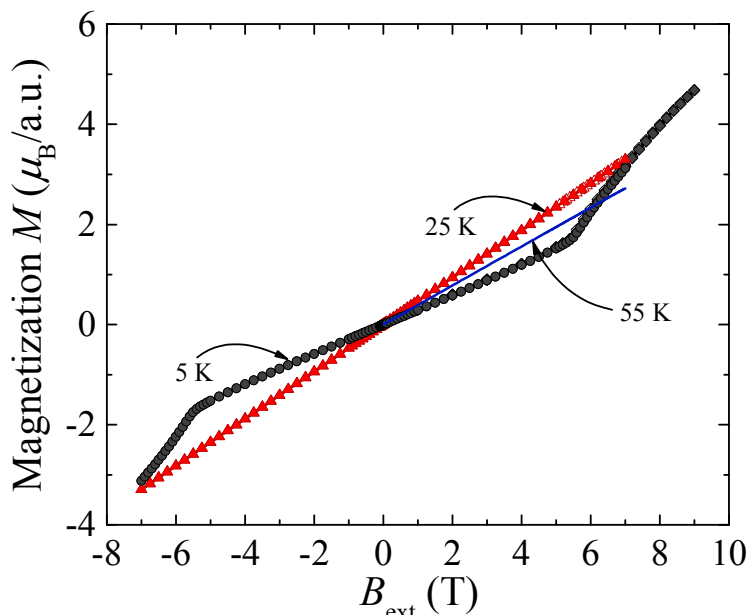

**Figure S1.** The field dependencies of magnetization  $M$  in  $\text{Fe}_7(\text{PO}_4)_6$  measured at various temperatures.

### 1. Calculation of the “lattice” and the “overlap” contributions to the EFG.

The lattice contribution to the EFG at the  $\text{Fe}^{3+}$  sites was calculated using a monopole-point-dipole model.<sup>S1</sup> The monopole contribution ( $V_{ij}^{\text{mon}}$ ) is given by

$$V_{ij}^{\text{mon}} = \sum_k Z_k (3x_{ik}x_{jk} - \delta_{ij}r_k^2)/r_k^5, \quad (\text{S1})$$

where  $Z_k$  is the charge and  $x_{ik}$  ( $x_{jk}$ ) are the Cartesian coordinates of the  $k$ -th ion with a distance  $r_k$  from the origin located at a given site,  $\delta_{ij}$  is the Kronecher index. The dipole contribution  $V_{ij}^{\text{dip}}$  is

$$V_{ij}^{\text{dip}} = \sum_k -3[(x_{ik}p_{ik})(5x_{ik}x_{jk} - \delta_{ij}r_k^2)/r_k^7 - (x_{ik}p_{jk} + x_{jk}p_{ik})/r_k^5], \quad (\text{S2})$$

where  $p_{ik}$  is the  $i$ -th component of the induced dipole moment on the  $k$ -th ion and the other symbols have the same meaning as in Eq. (S1). The components of the induced dipole moment are equal to

$$p_{ik} = \sum_j \alpha_{ij}^k E_j^k, \quad (\text{S3})$$

where  $\alpha^k$  is the polarizability tensor of the  $k$ -th ion and  $E_j^k$  is the  $j$ -th component of the total electric field at the  $k$ -th ion. Since the induced dipole moments contribute to the electric field themselves, they have been calculated with a self-consistent iterative process. Due to the local symmetry at the sites of the  $\text{Fe}^{3+}$  and  $\text{P}^{+5}$  cations and its small ionic radii a significant electric field  $E^k$  exists only at the oxygen sites in the  $\text{Fe}_7(\text{PO}_4)_6$  lattice. Thus, only the oxygen ions ( $\alpha_O$ ) contribute to  $V_{ij}^{\text{dip}}$ . The  $\alpha_O$  value is not well known and was estimated from the best fit of the theoretical EFG's to the measured data. In our calculations, we used values of  $\alpha_O$  in the range 0 - 2 Å<sup>3</sup>. The lattice sums in Eq. (S1) and (S2) were calculated with the spherical boundary method in which the summation is carried out by considering the contributions from all lattice sites inside given radius ( $r$ ) sphere of 50 Å.

The discrepancy between the calculated and observed EFG values is usually attributed to effects of covalency on the EFG at the nucleus.<sup>S2</sup> One of the main covalent contributions to the EFG tensor ( $V_{ii}^{\text{ov}}$ ) is caused by the overlap of  $2s/2p$  orbitals of the  $\text{O}^{2-}$  anions with the  $np$  orbitals of iron cations.<sup>S3,S4</sup>

$$\begin{aligned} V_{xx}^{\text{ov}} &= -\sum_k \frac{4}{5} |e| \left( 3 \sin^2 \theta_k \cos^2 \phi_k - 1 \right) \left[ \sum_n \langle r_{np}^{-3} \rangle (S_{np}^k)^2 \right] \\ V_{yy}^{\text{ov}} &= -\sum_k \frac{4}{5} |e| \left( 3 \sin^2 \theta_k \sin^2 \phi_k - 1 \right) \left[ \sum_n \langle r_{np}^{-3} \rangle (S_{np}^k)^2 \right], \\ V_{zz}^{\text{ov}} &= -\sum_k \frac{4}{5} |e| \left( 3 \cos^2 \theta_k - 1 \right) \left[ \sum_n \langle r_{np}^{-3} \rangle (S_{np}^k)^2 \right] \end{aligned} \quad (\text{S4})$$

where the summation over “ $k$ ” extends over all the Fe-O bonds in the (FeO<sub>5</sub>)/(FeO<sub>6</sub>) polyhedra;  $(S_{np}^k)^2 = \{S_{np,s}^2 + S_{np,\sigma}^2 - S_{np,\pi}^2\}$  are the overlap integrals of the  $np$  orbitals of the iron with the  $2s/2p$  orbitals of the oxygen O<sup>2-</sup> ions;  $\theta_k$  and  $\varphi_k$  are common angular coordinates of the oxygen anion at “ $k$ ” site;  $\langle r_{nl}^{-3} \rangle$  refers to the  $nl$ -wave function of the Fe<sup>3+</sup> closed orbitals:  $\langle r_{3p}^{-3} \rangle = 55.93$ , and  $\langle r_{2p}^{-3} \rangle = 461.8$  in a.u.<sup>S5</sup> The overlap integrals were calculated using  $2s$  and  $2p$  Watson’s O<sup>2-</sup> wave functions in a “+3” stabilizing potential and  $np$  Clementi’s wave functions for Fe<sup>3+</sup>.<sup>S6</sup>

At the final stage, we corrected for shielding effects produced by the own electrons of the iron ions and external charges to obtain the total EFG at the <sup>57</sup>Fe nucleus:

$$V_{ij}^{\text{tot}} = (1 - \gamma_{\infty})V_{ij}^{\text{lat}} + (1 - R)V_{ij}^{\text{ov}}, \quad (\text{S5})$$

where  $\gamma_{\infty} = -9.14$  and  $R = 0.32$  are Sternheimer factors for these two contributions.<sup>S2</sup> The calculated total contributions to the EFG were diagonalized and the resulting principal values of  $\{V_{ii}^{\text{tot}}\}_{i=X,Y,Z}$  were designated according to the usual convention  $|V_{ZZ}| \geq |V_{YY}| \geq |V_{XX}|$ .

The oxygen dipole polarizability  $\alpha_O$  has been estimated with a self-consistent iterative method from the fit of the calculated EFG components to the experimental value of quadrupole splitting. Calculated values for  $V^{\text{mon}}$ ,  $V^{\text{dip}}$  and  $V^{\text{el}}$  contributions and its dependences as a function of the polarizability of oxygen ions ( $\alpha_O$ ) in Fe<sub>7</sub>(PO<sub>4</sub>)<sub>6</sub> structure are shown in Fig. S2. The best agreement between the theoretical and experimental values of quadrupole splitting at 300 K was found for the polarizability  $\alpha_O \approx 1.7 \text{ \AA}^3$  (for nominal charges  $Z_O = -2$ ,  $Z_{\text{Fe}} = +2/+3$ , and  $Z_P = +5$ ).

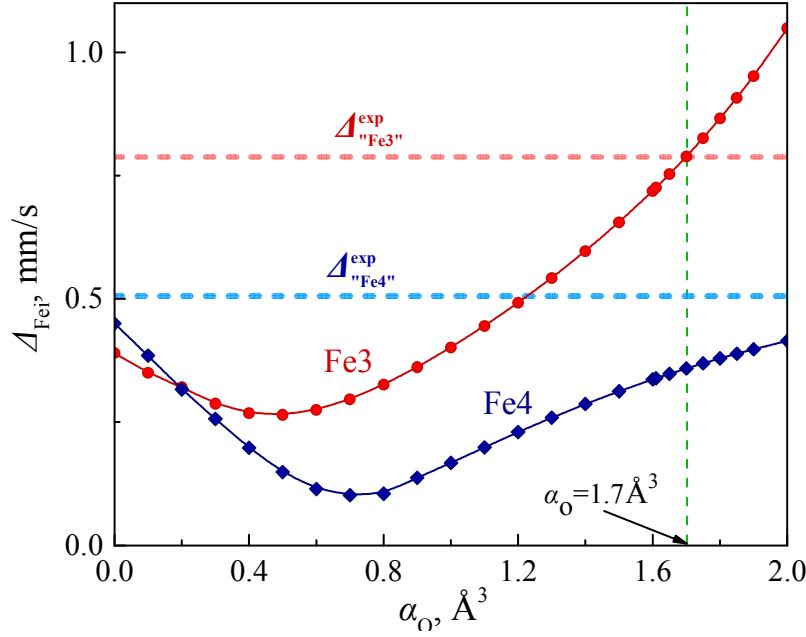

**Figure S2.** Theoretical dependences of the quadrupole splittings ( $\Delta_{\text{Fe}i}$ ) as a result of theoretical calculations of total ( $\tilde{V}^{\text{tot}}$ ) EFG for two ferrous Fe3 and Fe4 sites (lattice  $\tilde{V}^{\text{lat}} = (\tilde{V}^{\text{mon}} + \tilde{V}^{\text{dip}})$  and electronic ( $\tilde{V}^{\text{el}} \equiv \tilde{V}^{\text{ov}}$ ) contributions versus oxygen polarizability ( $\alpha_O$ ). The dashed horizontal lines denote the experimental values of the quadrupole splittings  $\Delta_{\text{Fe}3}$  and  $\Delta_{\text{Fe}4}$ . The dotted vertical arrow corresponds to the polarizability values  $\langle \alpha_O \rangle \approx 1.7 \text{ \AA}^3$  (see text) that allow the best description of the experimental data.

## 2. Crystal field calculations.

The energies ( $\varepsilon_k$ ) of the 3d orbitals ( $\phi_{p,q}$ ) for the system are obtained by diagonalizing the real symmetrical matrices:

$$\det \| H_{pq} - S_{pq} \varepsilon_k \| = 0, \quad (\text{S6})$$

where  $H_{pq} = \langle \phi_p | \hat{V}_C | \phi_q \rangle$  and  $S_{pq} = \langle \phi_p | \phi_q \rangle$ . We have chosen the real  $d$  orbitals as a basic set:

$$\begin{aligned} \psi_1 &= d_{x^2-y^2} = R_{3d} \frac{1}{\sqrt{2}} [Y_{22} + Y_{22}^*], \\ \psi_2 &= d_{xz} = R_{3d} \frac{1}{\sqrt{2}} [Y_{21} + Y_{21}^*], \\ \psi_3 &= d_{z^2} = R_{3d} Y_{20}, \\ \psi_4 &= d_{yz} = R_{3d} \frac{-i}{\sqrt{2}} [Y_{21} - Y_{21}^*], \\ \psi_5 &= d_{xy} = R_{3d} \frac{-i}{\sqrt{2}} [Y_{22} - Y_{22}^*], \end{aligned} \quad (\text{S7})$$

The formal expansion of the crystal potential ( $V_C$ ) has the form:<sup>S7</sup>

$$V_C = \sum_i^N \frac{Z_i e^2}{r_{ij}} = \sum_i^N Z_i e^2 \left[ \sum_{l=0}^{\infty} \sum_{m=-l}^{m=l} \frac{4\pi}{2l+1} \left( \frac{r_{<}^l}{r_{>}^{l+1}} \right) Y_{lm}^*(\theta_i, \varphi_i) Y_{lm}(\theta_i, \varphi_i) \right], \quad (\text{S8})$$

where  $Y_{lm}(\theta, \phi)$  are spherical harmonics describing all angular positions of the  $d$  electrons,  $r_{<} \equiv r$  and  $r_{>} \equiv R$  are the shorter (electron) and longer (ligands) of the radial vectors connecting the origin to the electron and to ligands (Fig. S3). The  $H_{pq}$  integrals are presented in terms of the ligand position functions,  $D_{lm}^i$  and  $G_{lm}^i$ , listed in Table S1. Each  $D_{lm}^i$  and  $G_{lm}^i$  is characteristic of one ligand and its coordinates, and the sums yielding,  $D_{lm} = \sum_i D_{lm}^i$  and  $G_{lm} = \sum_i G_{lm}^i$ , are taken over all ligands in the  $(\text{FeO}_n)$  polyhedra. The radial integrals  $\alpha_l^i$  in  $D_{lm}^i$  and  $G_{lm}^i$  are given by

$$\alpha_l^i = Z_i e^2 \int_0^\infty (R_{3d})^2 \left[ \frac{r_{<}^l}{r_{>}^{l+1}} \right]_i r^2 dr, \quad (9S)$$

In practices the  $\alpha_l^i$  integrals and also its ratios  $\xi = (\alpha_2/\alpha_4)^i$  frequently are determined experimentally through study of optical absorption spectra in terms of an empirically evaluated parameter such as  $Dq$ .<sup>S7</sup> In our case, we employ the approximation  $\alpha_2 = 4\alpha_4$ . The problem reduces thus to evaluation of the  $H_{pq}$  integrals and the solution of equations for the five roots  $\varepsilon_k$ .

For the Fe1 and Fe2 sites the five and six ligands, respectively, affecting the crystal field are assumed identical and of charge  $Ze$ , with the coordinates enumerated below. The resulting  $\|H_{pq}\|$  matrixes and the numerical evaluation of its  $H_{pq}$  elements for Fe1 and Fe2 sites in the local coordinate systems  $\delta(x_i, y_i, z_i)$  in  $\text{Fe}_7(\text{PO}_4)_6$  are presented in the Table S3.

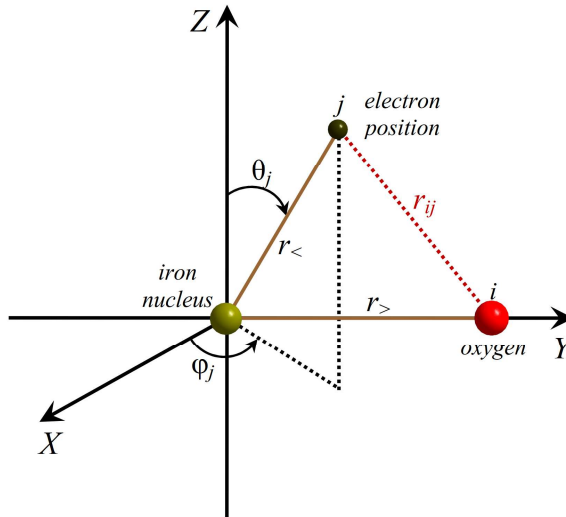

**Figure S3.** Coordinate system for iron ion and point-charge ligands (oxygen ions).

## REFERENCES

- (S1) Stadnik, Z. M. Electronic field gradient calculations in rare-earth iron garnets. *J. Phys. Chem. Solids* **1984**, *45*, 311-318.
- (S2) *Mössbauer Spectroscopy and Transition Metal Chemistry (Fundamentals and Applications)*; Gülich, P.; Bill, E.; Trautwein, A. X., Eds.; Springer, Berlin, Heidelberg, 2012.
- (S3) Sharma, R. R.; Teng, B. Quadrupole Coupling Constants of  $\text{Fe}^{3+}$  in Yttrium Iron Garnet. *Phys. Rev. Lett.* **1971**, *27*, 679-681
- (S4) Sharma, R. R. Nuclear Quadrupole Interactions in Several Rare-Earth Iron Garnets. *Phys. Rev. B* **1972**, *6*, 4310-4323.
- (S5) Watson, R. E. Analytic Hartree-Fock Solutions for  $\text{O}^{\cdot-}$ . *Phys. Rev.* **1958**, *111*, 1108-1110.
- (S6) Clementi, E. Ab Initio Computations in Atoms and Molecules. *IBM J. Res. Develop.* **1965**, *9*, 2-19.
- (S7) Companion, A. L.; Komarynsky, M. A. Crystal Field Splitting Diagrams. *J. Chem. Education* **1964**, *41*, 257-262.

**Table S1.** The ligand position functions  $D_{lm}^i$  and  $G_{lm}^i$  (left column), and the integrals  $H_{pq}$  in terms of  $D_{lm}$  and  $G_{lm}$  (right column).

|                                                                                                                                                                                                                                                                                                                                                                                                                                                                                                                                                                                                                                                                                                                                                                                                                                                                                                                                                                                                                                                                                                             |                                                                                                                                                                                                                                                                                                                                                                                                                                                                                                                                                                                                                                                                                                                                                                                                                                                                                                                                                                                                                                                                                                                                                                                 |
|-------------------------------------------------------------------------------------------------------------------------------------------------------------------------------------------------------------------------------------------------------------------------------------------------------------------------------------------------------------------------------------------------------------------------------------------------------------------------------------------------------------------------------------------------------------------------------------------------------------------------------------------------------------------------------------------------------------------------------------------------------------------------------------------------------------------------------------------------------------------------------------------------------------------------------------------------------------------------------------------------------------------------------------------------------------------------------------------------------------|---------------------------------------------------------------------------------------------------------------------------------------------------------------------------------------------------------------------------------------------------------------------------------------------------------------------------------------------------------------------------------------------------------------------------------------------------------------------------------------------------------------------------------------------------------------------------------------------------------------------------------------------------------------------------------------------------------------------------------------------------------------------------------------------------------------------------------------------------------------------------------------------------------------------------------------------------------------------------------------------------------------------------------------------------------------------------------------------------------------------------------------------------------------------------------|
| $D_{00}^i = \alpha_0^i$<br>$D_{20}^i = \alpha_2^i (3 \cos^2 \theta_i - 1)$<br>$D_{40}^i = \alpha_4^i (\frac{35}{3} \cos^4 \theta_i - 10 \cos^2 \theta_i + 1)$<br>$D_{21}^i = \alpha_2^i \sin \theta_i \cos \theta_i \cos \varphi_i$<br>$D_{22}^i = \alpha_2^i \sin^2 \theta_i \cos(2\varphi_i)$<br>$D_{41}^i = \alpha_4^i \sin \theta_i \cos \theta_i (\frac{7}{3} \cos^2 \theta_i - 1) \cos \varphi_i$<br>$D_{42}^i = \alpha_4^i \sin^2 \theta_i (7 \cos^2 \theta_i - 1) \cos(2\varphi_i)$<br>$D_{43}^i = \alpha_4^i \sin^3 \theta_i \cos \theta_i \cos(3\varphi_i)$<br>$D_{44}^i = \alpha_4^i \sin^4 \theta_i \cos(4\varphi_i)$<br><br>$G_{21}^i = \alpha_2^i \sin \theta_i \cos \theta_i \sin(2\varphi_i)$<br>$G_{22}^i = \alpha_2^i \sin^2 \theta_i \sin(2\varphi_i)$<br>$G_{41}^i = \alpha_4^i \sin \theta_i \cos \theta_i (\frac{7}{3} \cos^2 \theta_i - 1) \sin \varphi_i$<br>$G_{42}^i = \alpha_4^i \sin^2 \theta_i (7 \cos^2 \theta_i - 1) \sin(2\varphi_i)$<br>$G_{43}^i = \alpha_4^i \sin^3 \theta_i \cos \theta_i \sin(3\varphi_i)$<br>$G_{44}^i = \alpha_4^i \sin^4 \theta_i \sin(4\varphi_i)$ | $H_{11} = D_{00} - \frac{1}{7} D_{20} + \frac{1}{56} D_{40} + \frac{5}{24} D_{44}$<br>$H_{22} = D_{00} + \frac{1}{14} D_{20} - \frac{1}{14} D_{40} + \frac{3}{14} D_{22} + \frac{5}{42} D_{42}$<br>$H_{33} = D_{00} + \frac{1}{7} D_{20} + \frac{3}{28} D_{40}$<br>$H_{44} = D_{00} + \frac{1}{14} D_{20} - \frac{1}{14} D_{40} - \frac{3}{14} D_{22} - \frac{5}{42} D_{42}$<br>$H_{55} = D_{00} - \frac{1}{7} D_{20} + \frac{1}{56} D_{40} - \frac{5}{24} D_{44}$<br><br>$H_{12} = \frac{3}{7} D_{21} - \frac{5}{28} D_{41} + \frac{5}{12} D_{43}$<br>$H_{13} = -\frac{\sqrt{3}}{7} D_{22} + \frac{5\sqrt{3}}{84} D_{42}$<br>$H_{14} = -\frac{3}{7} G_{21} + \frac{5}{28} G_{41} + \frac{5}{12} G_{43}$<br>$H_{15} = \frac{5}{24} G_{44}$<br>$H_{23} = \frac{\sqrt{3}}{7} D_{21} + \frac{5\sqrt{3}}{14} D_{41}$<br>$H_{24} = \frac{3}{14} G_{22} + \frac{5}{42} G_{42}$<br>$H_{25} = \frac{3}{7} G_{21} - \frac{5}{28} G_{41} + \frac{5}{12} G_{43}$<br>$H_{34} = \frac{\sqrt{3}}{7} G_{21} + \frac{5\sqrt{3}}{14} G_{41}$<br>$H_{35} = -\frac{\sqrt{3}}{7} G_{22} + \frac{5\sqrt{3}}{84} G_{42}$<br>$H_{45} = \frac{3}{7} D_{21} - \frac{5}{28} D_{41} - \frac{5}{12} D_{43}$ |
|-------------------------------------------------------------------------------------------------------------------------------------------------------------------------------------------------------------------------------------------------------------------------------------------------------------------------------------------------------------------------------------------------------------------------------------------------------------------------------------------------------------------------------------------------------------------------------------------------------------------------------------------------------------------------------------------------------------------------------------------------------------------------------------------------------------------------------------------------------------------------------------------------------------------------------------------------------------------------------------------------------------------------------------------------------------------------------------------------------------|---------------------------------------------------------------------------------------------------------------------------------------------------------------------------------------------------------------------------------------------------------------------------------------------------------------------------------------------------------------------------------------------------------------------------------------------------------------------------------------------------------------------------------------------------------------------------------------------------------------------------------------------------------------------------------------------------------------------------------------------------------------------------------------------------------------------------------------------------------------------------------------------------------------------------------------------------------------------------------------------------------------------------------------------------------------------------------------------------------------------------------------------------------------------------------|

**Table S2.** Angular coordinates of Fe1 and Fe2 oxygen ligands ( $O_i$ ).

| Fe1    |                    |                     |                   |
|--------|--------------------|---------------------|-------------------|
| Ligand | Coordinates        |                     |                   |
|        | $\theta_i, ^\circ$ | $\varphi_i, ^\circ$ | $R_i, \text{\AA}$ |
| O2     | 90                 | 90                  | 2.016             |
| O8     | 90                 | 0                   | 2.199             |
| O4     | 0                  | 0                   | 2.053             |
| O10    | 90                 | 233.8               | 1.942             |
| O9     | 180                | 0                   | 2.053             |

| Fe2    |                    |                     |                   |
|--------|--------------------|---------------------|-------------------|
| Ligand | Coordinates        |                     |                   |
|        | $\theta_i, ^\circ$ | $\varphi_i, ^\circ$ | $R_i, \text{\AA}$ |
| O1     | 90                 | 90                  | 2.231             |
| O6     | 90                 | 0                   | 2.029             |
| O10    | 0                  | 0                   | 2.311             |
| O1     | 90                 | 270                 | 2.231             |
| O6     | 90                 | 180                 | 2.029             |
| O10    | 180                | 0                   | 2.311             |

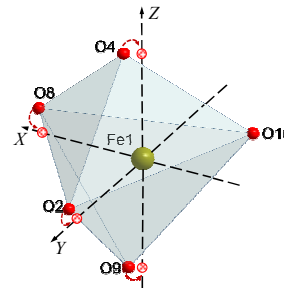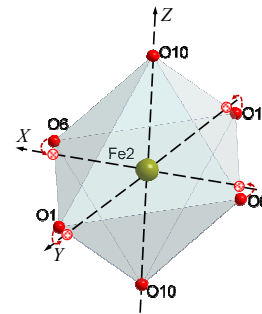

**Table S3.** The integrals  $\|H_{pq}\|$  matrixes and the numerical evaluation of its  $H_{pq}$  elements for Fe1 and Fe2 sites in the local coordinate systems  $\hat{o}(x_i, y_i, z_i)$  (*see text*).

| Fe1 ( $C_s$ )                                                                                                                                                                                          |         |          |          |  |
|--------------------------------------------------------------------------------------------------------------------------------------------------------------------------------------------------------|---------|----------|----------|--|
| $\begin{pmatrix} H_{11} & H_{13} & H_{15} & 0 & 0 \\ H_{31} & H_{33} & H_{35} & 0 & 0 \\ H_{51} & H_{53} & H_{55} & 0 & 0 \\ 0 & 0 & 0 & H_{22} & H_{24} \\ 0 & 0 & 0 & H_{42} & H_{44} \end{pmatrix}$ |         |          |          |  |
| $H_{pq} = l \cdot \langle \alpha_0 \rangle + \langle \alpha_4 \rangle \cdot [m \cdot \xi + n]$                                                                                                         |         |          |          |  |
| $H_{pq}$                                                                                                                                                                                               | $l$     | $m$      | $n$      |  |
| $H_{11}$                                                                                                                                                                                               | 5.00814 | -0.13545 | 0.30190  |  |
| $H_{22}$                                                                                                                                                                                               | 5.00814 | -0.06068 | -0.51019 |  |
| $H_{33}$                                                                                                                                                                                               | 5.00814 | 0.13545  | 0.90535  |  |
| $H_{44}$                                                                                                                                                                                               | 5.00814 | 0.19613  | -0.69695 |  |
| $H_{55}$                                                                                                                                                                                               | 5.00814 | -0.13545 | -0.00011 |  |
| $H_{13}$                                                                                                                                                                                               | 0       | 0.14827  | 0.08087  |  |
| $H_{15}$                                                                                                                                                                                               | 0       | 0        | -0.15841 |  |
| $H_{24}$                                                                                                                                                                                               | 0       | 0.24118  | -0.14968 |  |
| $H_{35}$                                                                                                                                                                                               | 0       | -0.27849 | -0.12963 |  |

| Fe2 ( $D_{2h}$ )                                                                                                                                                         |         |          |          |  |
|--------------------------------------------------------------------------------------------------------------------------------------------------------------------------|---------|----------|----------|--|
| $\begin{pmatrix} H_{11} & H_{13} & 0 & 0 & 0 \\ H_{31} & H_{33} & 0 & 0 & 0 \\ 0 & 0 & H_{22} & 0 & 0 \\ 0 & 0 & 0 & H_{44} & 0 \\ 0 & 0 & 0 & 0 & H_{55} \end{pmatrix}$ |         |          |          |  |
| $H_{pq} = l \cdot \langle \alpha_0 \rangle + \langle \alpha_4 \rangle \cdot [m \cdot \xi + n]$                                                                           |         |          |          |  |
| $H_{pq}$                                                                                                                                                                 | $l$     | $m$      | $n$      |  |
| $H_{11}$                                                                                                                                                                 | 6.01811 | 0.14337  | 1.14861  |  |
| $H_{22}$                                                                                                                                                                 | 6.01811 | 0.06159  | -0.76258 |  |
| $H_{33}$                                                                                                                                                                 | 6.01811 | -0.14337 | 0.94652  |  |
| $H_{44}$                                                                                                                                                                 | 6.01811 | -0.20495 | -0.49944 |  |
| $H_{55}$                                                                                                                                                                 | 6.01811 | 0.14337  | -0.83311 |  |
| $H_{13}$                                                                                                                                                                 | 0       | -0.15389 | -0.11394 |  |
